# Supplementary material for: Sounds are remapped across saccades
Source: PubMed Central journal article supplement (PMC7721892; doi:10.1038/s41598-020-78163-y), 2020-12-07
Supplement: 41598_2020_78163_MOESM1_ESM.pdf [file 41598_2020_78163_MOESM1_ESM.pdf]

## **Sounds are remapped across saccades**

Martin Szinte<sup>1\*</sup>, David Aagten-Murphy<sup>2</sup>, Donatas Jonikaitis<sup>3</sup>, Luca Wollenberg<sup>2,4</sup> & Heiner Deubel<sup>2</sup>

- 1 Institut de Neurosciences de la Timone,  
Centre National de la Recherche Scientifique, Aix-Marseille Université, UMR 7289, Marseille, France.
- 2 Allgemeine und Experimentelle Psychologie,  
Ludwig-Maximilians-Universität München, Munich, Germany.
- 3 Department of Neurobiology and Howard Hughes Medical Institute,  
Stanford University School of Medicine, Stanford, USA.
- 4 Graduate School of Systemic Neurosciences,  
Ludwig-Maximilians-Universität München, Planegg-Martinsried, Germany.

\*[martin.szinte@gmail.com](mailto:martin.szinte@gmail.com)

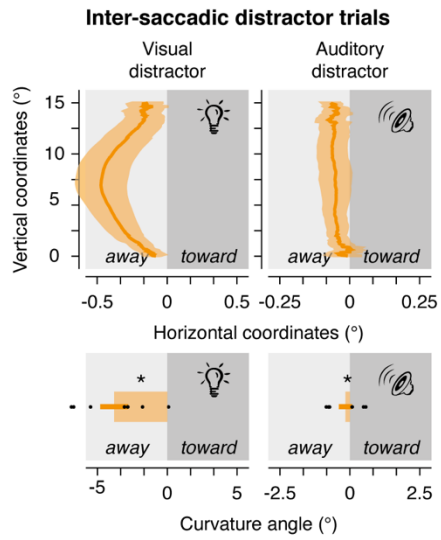

**Figure S1. Inter-saccadic distractor trials.** Averaged normalized second saccade trajectory (top panels) and curvature angle (bottom panels) observed following the presentation of a visual (left panels) or an auditory (right panels) inter-saccadic distractor in Exp. 2. Saccade trajectories are rotated in order to have upward saccades and negative x-values representing coordinates away from the screen position of the distractor. Areas around the averaged saccade trajectory and error bars represent SEM. Black dots show individual participants. Asterisk indicates a significant effect ( $p < 0.05$ , ns: non-significant).

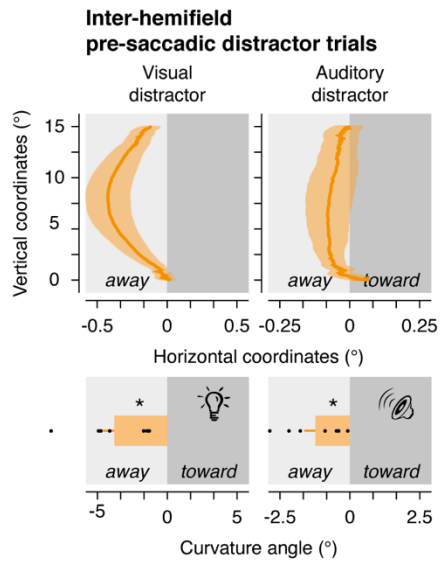

**Figure S2. Inter-hemifield pre-saccadic distractor trials.** Averaged normalized second saccade trajectory (top panels) and normalized curvature angle (bottom panels) observed following the presentation of a visual (left panels) or an auditory (right panels) inter-hemifield pre-saccadic distractor in Exp. 2. Conventions are as in Figure S1.
